# Supplementary material
Source: MDPI journal article supplement (https://www.mdpi.com/2304-6775/9/4/52)
Supplement: s1 [file s1]

### S3: Perceived impact of scientific misconduct on research quality

**S3-TableS1: Perceived frequency of scientific misconduct and impact thereof on research quality**

This table displays the means of perceived frequency and impact on the respective quality criterion of each misbehaviour item (scale range: 1-5). The rank numbers are calculated in descending order. QC1 (Quality Criterion 1): “validity of the findings at hand”; QC2 (Quality Criterion 2): “the resulting paper's ability to convey the research appropriately”; QC3 (Quality Criterion 3): “impact on research diversity”

| Item # | Type of Misbehaviour                                                                                                        | Frequency | Frequency Rank | QC1  | QC1 Rank | QC2  | QC2 Rank | QC3  | QC3 Rank |
|--------|-----------------------------------------------------------------------------------------------------------------------------|-----------|----------------|------|----------|------|----------|------|----------|
| 1      | Inappropriate or careless peer review of papers or proposals                                                                | 2.76      | 12             | 3.31 | 9        | 3.35 | 9        |      |          |
| 2      | Not ensuring easy reproducibility when writing a paper                                                                      | 3.19      | 9              | 3.51 | 7        | 3.46 | 7        |      |          |
| 3      | Spread study results over more papers than needed                                                                           | 3.30      | 6              | 2.61 | 16       | 2.99 | 15       |      |          |
| 4      | Inadequate monitoring of research projects due to work overload                                                             | 3.42      | 3              | 3.40 | 8        | 3.37 | 8        |      |          |
| 5      | Cutting corners in a hurry to complete a project                                                                            | 3.23      | 8              | 3.66 | 6        | 3.52 | 6        |      |          |
| 6      | Not sharing ancillary or meta data                                                                                          | 3.29      | 7              | 3.29 | 10       | 3.31 | 10       |      |          |
| 7      | Not sharing the reduction algorithm used for data analysis                                                                  | 3.40      | 5              | 3.22 | 11       | 3.21 | 11       |      |          |
| 8      | Propose study questions solely because they are considered a 'hot' topic                                                    | 3.88      | 1              | 2.91 | 13       | 2.87 | 16       | 3.70 | 2        |
| 9      | Not considering a study question because it isn't considered a 'hot' topic, even though it could be important for astronomy | 3.40      | 4              | 3.05 | 12       | 3.08 | 13       | 3.79 | 1        |

|    |                                                                                                 |      |    |      |    |      |    |  |  |
|----|-------------------------------------------------------------------------------------------------|------|----|------|----|------|----|--|--|
| 10 | Giving authorship credit to someone who has not contributed substantively to a manuscript       | 3.73 | 2  | 1.97 | 18 | 2.06 | 18 |  |  |
| 11 | Denying authorship credit to someone who has contributed substantively to a manuscript          | 2.05 | 17 | 2.53 | 17 | 2.67 | 17 |  |  |
| 12 | Intentionally overlooking others' use of flawed data or methods                                 | 2.48 | 16 | 3.74 | 5  | 3.61 | 5  |  |  |
| 13 | Data fabrication and/ or falsification                                                          | 1.95 | 18 | 4.17 | 1  | 4.01 | 1  |  |  |
| 14 | Compromising the rigor of a study's design or methodology in response to (publication) pressure | 2.93 | 11 | 3.80 | 4  | 3.64 | 4  |  |  |
| 15 | Using published ideas or phrases of others without referencing (Plagiarism)                     | 2.61 | 13 | 2.82 | 14 | 3.18 | 12 |  |  |
| 16 | Using unpublished ideas or phrases of others without their permission                           | 2.49 | 15 | 2.80 | 15 | 3.07 | 14 |  |  |
| 17 | Concealing results that contradict one's earlier findings or convictions                        | 2.59 | 14 | 3.93 | 3  | 3.84 | 3  |  |  |
| 18 | Biased interpretation of data that distorts results                                             | 3.08 | 10 | 4.04 | 2  | 3.95 | 2  |  |  |

### S3-TableS2: Perceived impact of scientific misbehavior on research quality

This table displays the perceived impact for each of 18 types of misbehaviour as the product score of the means of perceived frequency of each misbehaviour and impact on the three aspects of research quality (numbers taken from *S3-Table1*). The rank number is calculated in descending order. Given that the answer scales range from 1 to 5; the results of perceived impact can range between 1 and 25.

| Type of misbehaviour & Type of quality criterion                                                                                    | Perceived impact | Rank Number | Type of misbehaviour & Type of quality criterion                                                                                    | Perceived impact | Rank Number |
|-------------------------------------------------------------------------------------------------------------------------------------|------------------|-------------|-------------------------------------------------------------------------------------------------------------------------------------|------------------|-------------|
| “Propose study questions solely because they are considered a 'hot' topic” & QC3                                                    | 14.33            | 1           | “Not considering a study question because it isn't considered a 'hot' topic, even though it could be important for astronomy” & QC1 | 10.36            | 20          |
| “Not considering a study question because it isn't considered a 'hot' topic, even though it could be important for astronomy” & QC3 | 12.89            | 2           | “Concealing results that contradict one's earlier findings or convictions” & QC1                                                    | 10.18            | 21          |
| “Biased interpretation of data that distorts results” & QC1                                                                         | 12.47            | 3           | “Concealing results that contradict one's earlier findings or convictions” & QC2                                                    | 9.95             | 22          |
| “Biased interpretation of data that distorts results” & QC2                                                                         | 12.17            | 4           | “Spread study results over more papers than needed” & QC2                                                                           | 9.87             | 23          |
| “Cutting corners in a hurry to complete a project” & QC1                                                                            | 11.80            | 5           | “Intentionally overlooking others’ use of flawed data or methods” & QC1                                                             | 9.27             | 24          |
| “Inadequate monitoring of research projects due to work overload” & QC1                                                             | 11.61            | 6           | “Inappropriate or careless peer review of papers or proposals” & QC2                                                                | 9.24             | 25          |
| “Inadequate monitoring of research projects due to work overload” & QC2                                                             | 11.51            | 7           | “Inappropriate or careless peer review of papers or proposals” & QC1                                                                | 9.14             | 26          |
| “Cutting corners in a hurry to complete a project” & QC2                                                                            | 11.37            | 8           | “Intentionally overlooking others’ use of flawed data or methods” & QC2                                                             | 8.97             | 27          |
| “Propose study questions solely because they are considered a 'hot' topic” & QC1                                                    | 11.29            | 9           | “Spread study results over more papers than needed” & QC1                                                                           | 8.61             | 28          |
| “Not ensuring easy reproducibility when writing a paper” & QC1                                                                      | 11.2             | 10          | “Using published ideas or phrases of others without referencing (Plagiarism)” & QC2                                                 | 8.29             | 29          |
| “Compromising the rigor of a study’s design or methodology in response to (publication) pressure” & QC1                             | 11.14            | 11          | “Data fabrication and/ or falsification” & QC1                                                                                      | 8.15             | 30          |

|                                                                                                                                     |       |    |                                                                                                   |      |    |
|-------------------------------------------------------------------------------------------------------------------------------------|-------|----|---------------------------------------------------------------------------------------------------|------|----|
| “Propose study questions solely because they are considered a 'hot' topic” & QC2                                                    | 11.12 | 12 | “Data fabrication and/ or falsification” & QC2                                                    | 7.84 | 31 |
| “Not ensuring easy reproducibility when writing a paper” & QC2                                                                      | 11.03 | 13 | “Giving authorship credit to someone who has not contributed substantively to a manuscript” & QC2 | 7.67 | 32 |
| “Not sharing the reduction algorithm used for data analysis” & QC1                                                                  | 10.93 | 14 | “Using unpublished ideas or phrases of others without their permission” & QC2                     | 7.65 | 33 |
| “Not sharing the reduction algorithm used for data analysis” & QC2                                                                  | 10.92 | 15 | “Using published ideas or phrases of others without referencing (Plagiarism)” & QC1               | 7.37 | 34 |
| “Not sharing ancillary or meta data” & QC2                                                                                          | 10.91 | 16 | “Giving authorship credit to someone who has not contributed substantively to a manuscript” & QC1 | 7.34 | 35 |
| “Not sharing ancillary or meta data” & QC1                                                                                          | 10.82 | 17 | “Using unpublished ideas or phrases of others without their permission” & QC1                     | 6.96 | 36 |
| “Compromising the rigor of a study’s design or methodology in response to (publication) pressure” & QC2                             | 10.66 | 18 | “Denying authorship credit to someone who has contributed substantively to a manuscript” & QC2    | 5.48 | 37 |
| “Not considering a study question because it isn't considered a 'hot' topic, even though it could be important for astronomy” & QC2 | 10.47 | 19 | “Denying authorship credit to someone who has contributed substantively to a manuscript” & QC1    | 5.19 | 38 |
