# Supplementary material
Source: MDPI journal article supplement (https://www.mdpi.com/2304-6775/9/4/52)
Supplement: s1 [file s1]

## S2: EFAs & CFAs

### S2-TableS1a: PPQ Cronbach Alphas before removal of items

This table displays the SPSS output of the Cronbach alphas of the PPQ consisting of 22 items (see *S1-Appendix: S1-Table2*). \* denotes items that we subsequently removed.

| Reliability Statistics |            |  |  |  |
|------------------------|------------|--|--|--|
| Cronbachs              |            |  |  |  |
| Alpha                  | N of Items |  |  |  |
| .783                   | 22         |  |  |  |

  

| Item-Total-Statistics                                                       |                            |                                |                                  |                                  |
|-----------------------------------------------------------------------------|----------------------------|--------------------------------|----------------------------------|----------------------------------|
| PPQ Items                                                                   | Scale Mean if Item Deleted | Scale Variance if Item Deleted | Corrected Item-Total Correlation | Cronbach's Alpha if Item Deleted |
| Publication of scientific articles is the most important aspect of my work* | 65.43                      | 113.930                        | -.043                            | .796                             |
| The number of scientific publications contributes to my status*             | 64.76                      | 110.446                        | .149                             | .784                             |

|                                                                                                                                   |       |         |      |      |
|-----------------------------------------------------------------------------------------------------------------------------------|-------|---------|------|------|
| I experience my colleagues' assessment of me on the basis of my publications as stressful                                         | 65.54 | 99.204  | .532 | .761 |
| I experience the publication criteria formulated by my university for my appointment or reappointment as professor as a stimulus* | 65.45 | 112.128 | .027 | .793 |
| Publication pressure puts pressure on relationships with fellow-researchers                                                       | 65.38 | 99.598  | .536 | .761 |
| In my opinion the pressure to publish scientific articles has become too high                                                     | 64.75 | 99.966  | .587 | .760 |
| The competitive scientific climate stimulates me to publish more*                                                                 | 65.78 | 110.432 | .089 | .790 |
| My colleagues judge me mainly on the basis of my publications                                                                     | 65.58 | 105.869 | .293 | .777 |

|                                                                                                             |       |         |       |      |
|-------------------------------------------------------------------------------------------------------------|-------|---------|-------|------|
| In spite of the pressure to publish, I enjoy investing in other activities that I feel complement research* | 66.76 | 113.442 | -.012 | .792 |
| In my experience, professors maintain their teaching skills well, despite publication pressure*             | 65.64 | 106.871 | .262  | .779 |
| I cannot confide innovative research proposals to my colleagues                                             | 66.27 | 103.657 | .378  | .772 |
| Without publication pressure, my scientific output would be of higher quality                               | 65.66 | 97.830  | .596  | .757 |
| My scientific publications contribute to better (future) astronomy*                                         | 66.69 | 111.162 | .143  | .783 |

|                                                                                                               |       |         |      |      |
|---------------------------------------------------------------------------------------------------------------|-------|---------|------|------|
| Publication pressure results in me publishing more without it compromising the quality of my scientific work* | 65.47 | 110.134 | .131 | .786 |
| I suspect that publication pressure leads some colleagues (whether intentionally or not) to fabricate data    | 65.89 | 102.337 | .413 | .769 |
| The validity of astronomy literature is increased by the publication pressure in academia*                    | 65.11 | 108.292 | .223 | .781 |
| Publication pressure leads to serious worldwide doubts about the validity of research results                 | 65.43 | 100.466 | .520 | .763 |
| Publication pressure harms science                                                                            | 65.07 | 98.834  | .598 | .758 |

|                                                                                                                                 |       |         |      |      |
|---------------------------------------------------------------------------------------------------------------------------------|-------|---------|------|------|
| Without publication pressure, I would invest more time into publishing ancillary & meta data                                    | 65.61 | 100.077 | .522 | .763 |
| In spite of the pressure to publish, I take the time to make my reduction algorithm available and usable for other researchers* | 66.13 | 109.239 | .151 | .785 |
| Without publication pressure I would spend more time on writing my publication in a clearly understandable and replicable way   | 65.69 | 97.946  | .565 | .759 |
| How often do you feel pressure to publish?                                                                                      | 65.59 | 100.945 | .532 | .763 |

**S2-TableS1b: PPQ Cronbach Alphas after removal of items**

This table displays the SPSS output of the Cronbach alphas of the cleaned PPQ after removal of items, which resulted in 12 remaining items.

| Reliability Statistics |                                        |            |
|------------------------|----------------------------------------|------------|
| Cronbachs Alpha        | Cronbachs Alpha for standardised Items | N of Items |
| .871                   | .871                                   | 12         |

| Item-Total-Statistics                                                                     |                            |                                |                                  |                              |                                  |
|-------------------------------------------------------------------------------------------|----------------------------|--------------------------------|----------------------------------|------------------------------|----------------------------------|
| Cleaned PPQ Items                                                                         | Scale Mean if Item Deleted | Scale Variance if Item Deleted | Corrected Item-Total Correlation | Squared Multiple Correlation | Cronbach's Alpha if Item Deleted |
| I experience my colleagues' assessment of me on the basis of my publications as stressful | 34.51                      | 73.685                         | .589                             | .424                         | .859                             |
| Publication pressure puts pressure on relationships with fellow-researchers               | 34.36                      | 73.539                         | .620                             | .419                         | .857                             |
| In my opinion the pressure to publish scientific articles has become too high             | 33.66                      | 75.354                         | .610                             | .465                         | .858                             |

|                                                                                                            |       |        |      |      |      |
|------------------------------------------------------------------------------------------------------------|-------|--------|------|------|------|
| My colleagues judge me mainly on the basis of my publications                                              | 34.57 | 79.577 | .356 | .225 | .873 |
| I cannot confide innovative research proposals to my colleagues                                            | 35.27 | 78.166 | .427 | .237 | .869 |
| Without publication pressure, my scientific output would be of higher quality                              | 34.63 | 72.761 | .655 | .530 | .854 |
| I suspect that publication pressure leads some colleagues (whether intentionally or not) to fabricate data | 34.82 | 77.464 | .426 | .237 | .869 |
| Publication pressure leads to serious worldwide doubts about the validity of research results              | 34.37 | 75.231 | .566 | .413 | .860 |
| Publication pressure harms science                                                                         | 33.97 | 75.126 | .595 | .497 | .859 |

|                                                                                                                               |       |        |      |      |      |
|-------------------------------------------------------------------------------------------------------------------------------|-------|--------|------|------|------|
| Without publication pressure, I would invest more time into publishing ancillary & meta data                                  | 34.57 | 74.144 | .600 | .432 | .858 |
| Without publication pressure I would spend more time on writing my publication in a clearly understandable and replicable way | 34.71 | 72.160 | .656 | .547 | .854 |
| How often do you feel pressure to publish?                                                                                    | 34.59 | 74.540 | .588 | .392 | .859 |

**S2-TableS1c: CATPCA for cleaned PPQ**

| Cleaned PPQ Items                                                                                                             | Pattern Matrix                                              |                                             |                                        |
|-------------------------------------------------------------------------------------------------------------------------------|-------------------------------------------------------------|---------------------------------------------|----------------------------------------|
|                                                                                                                               | Dimension                                                   |                                             |                                        |
|                                                                                                                               | F1 (Extent & Consequences on one's own conduct of research) | F2 (Impact on Relationship with colleagues) | F3 (Suspected consequences on science) |
| Without publication pressure I would spend more time on writing my publication in a clearly understandable and replicable way | .811                                                        | .008                                        | -.022                                  |
| Without publication pressure, my scientific output would be of higher quality                                                 | .809                                                        | -.058                                       | .057                                   |
| Without publication pressure, I would invest more time into publishing ancillary & meta data                                  | .779                                                        | .001                                        | -.073                                  |
| Publication pressure harms science                                                                                            | .639                                                        | -.138                                       | .328                                   |

|                                                                                                            |       |       |       |
|------------------------------------------------------------------------------------------------------------|-------|-------|-------|
| In my opinion the pressure to publish scientific articles has become too high                              | .585  | .115  | .167  |
| How often do you feel pressure to publish?                                                                 | .522  | .521  | -.227 |
| My colleagues judge me mainly on the basis of my publications                                              | -.169 | .866  | -.060 |
| I experience my colleagues' assessment of me on the basis of my publications as stressful                  | .298  | .662  | -.099 |
| I cannot confide innovative research proposals to my colleagues                                            | -.300 | .595  | .506  |
| [Publication pressure puts pressure on relationships with fellow-researchers                               | .167  | .552  | .240  |
| I suspect that publication pressure leads some colleagues (whether intentionally or not) to fabricate data | .005  | -.004 | .799  |

|                                                                                                           |      |       |      |
|-----------------------------------------------------------------------------------------------------------|------|-------|------|
| Publication pressure<br>leads to serious<br>worldwide doubts about<br>the validity of research<br>results | .368 | -.103 | .632 |
|-----------------------------------------------------------------------------------------------------------|------|-------|------|

**S2-TableS2a: CATPCA for ERI**

| ERI Items                                                                                                       | Pattern Matrix         |                               |             |                        |                                           |
|-----------------------------------------------------------------------------------------------------------------|------------------------|-------------------------------|-------------|------------------------|-------------------------------------------|
|                                                                                                                 | Dimension              |                               |             |                        |                                           |
|                                                                                                                 | F5<br>(Overcommitment) | F1 (Reward:<br>Job situation) | F3 (Effort) | F2 (Reward:<br>Salary) | F4 (Reward: Receiving praise/<br>respect) |
| Work rarely lets me go,<br>it is still on my mind<br>when I go to bed                                           | .850                   | .031                          | -.018       | .044                   | -.095                                     |
| As soon as I get up in<br>the morning I start<br>thinking about work                                            | .838                   | .090                          | -.104       | .013                   | .018                                      |
| After I finish my work<br>day, I can easily relax<br>and 'switch off' work                                      | .736                   | .019                          | .004        | .011                   | -.147                                     |
| If I postpone something<br>at work that I was<br>supposed to do today<br>I'll have trouble<br>sleeping at night | .651                   | -.112                         | .016        | .074                   | -.020                                     |
| People close to me say I<br>sacrifice too much for<br>my job                                                    | .494                   | .010                          | .222        | -.203                  | .029                                      |
| My job security is poor                                                                                         | -.094                  | .906                          | .107        | -.025                  | -.279                                     |
| My job promotion<br>prospects are good                                                                          | .156                   | .689                          | .041        | .077                   | .171                                      |

|                                                                                         |       |       |       |       |       |
|-----------------------------------------------------------------------------------------|-------|-------|-------|-------|-------|
| I have experienced or I expect to experience an undesirable change in my work situation | -.021 | .658  | -.181 | -.231 | .151  |
| Considering all my efforts and achievements, my job promotion prospects are adequate    | .071  | .631  | .027  | .252  | .167  |
| I have many interruptions and disturbances while performing my job                      | -.219 | .145  | .829  | .106  | -.258 |
| I have constant time pressure due to a heavy work load                                  | .144  | .034  | .740  | -.055 | .097  |
| Over the past few years, my job has become more and more demanding                      | .060  | -.002 | .693  | -.170 | .193  |
| I get easily overwhelmed by time pressures at work                                      | .113  | -.256 | .563  | .108  | .074  |
| Considering all my efforts and achievements, my salary is adequate                      | .022  | .014  | -.005 | .917  | -.019 |

|                                                                                                   |       |       |       |       |      |
|---------------------------------------------------------------------------------------------------|-------|-------|-------|-------|------|
| My salary is fair compared to others who have similar work tasks                                  | .008  | -.047 | -.016 | .888  | .069 |
| I receive the respect I deserve from my supervisor or a respective relevant person                | -.082 | -.077 | .013  | -.017 | .907 |
| Considering all my efforts and achievements, I receive the respect and prestige I deserve at work | -.107 | .155  | .020  | .113  | .721 |

**S2-TableS2b: Cronbach Alphas for Effort Construct**

| Reliability Statistics |            |  |  |  |
|------------------------|------------|--|--|--|
| Cronbachs              |            |  |  |  |
| Alpha                  | N of Items |  |  |  |
| .691                   | 4          |  |  |  |

  

| Item-Total-Statistics                                              |                               |                                      |                                        |                                        |
|--------------------------------------------------------------------|-------------------------------|--------------------------------------|----------------------------------------|----------------------------------------|
| ERI F3 Items (Effort)                                              | Scale Mean if<br>Item Deleted | Scale<br>Variance if<br>Item Deleted | Corrected<br>Item-Total<br>Correlation | Cronbach's<br>Alpha if Item<br>Deleted |
| I have constant time pressure due to a heavy work load             | 10.51                         | 6.109                                | .616                                   | .532                                   |
| I have many interruptions and disturbances while performing my job | 10.66                         | 7.295                                | .364                                   | .694                                   |
| Over the past few years, my job has become more and more demanding | 10.46                         | 6.900                                | .490                                   | .618                                   |
| I get easily overwhelmed by time pressures at work                 | 11.05                         | 6.691                                | .443                                   | .648                                   |

**S2-TableS2c: Cronbach Alphas for Overcommitment Construct**

| <b>Reliability Statistics</b> |            |  |  |  |
|-------------------------------|------------|--|--|--|
| Cronbachs<br>Alpha            | N of Items |  |  |  |
| .780                          | 5          |  |  |  |

  

| <b>Item-Total-Statistics</b>                                                                        |                               |                                      |                                        |                                        |
|-----------------------------------------------------------------------------------------------------|-------------------------------|--------------------------------------|----------------------------------------|----------------------------------------|
| ERI F5 Items<br>(Overcommitment)                                                                    | Scale Mean if<br>Item Deleted | Scale<br>Variance if<br>Item Deleted | Corrected<br>Item-Total<br>Correlation | Cronbach's<br>Alpha if Item<br>Deleted |
| As soon as I get up in the morning I start thinking about work                                      | 13.36                         | 13.876                               | .536                                   | .745                                   |
| After I finish my work day, I can easily relax and 'switch off' work                                | 13.62                         | 12.880                               | .577                                   | .731                                   |
| People close to me say I sacrifice too much for my job                                              | 13.95                         | 13.299                               | .493                                   | .761                                   |
| Work rarely lets me go, it is still on my mind when I go to bed                                     | 13.52                         | 12.527                               | .683                                   | .697                                   |
| If I postpone something at work that I was supposed to do today I'll have trouble sleeping at night | 14.21                         | 13.216                               | .499                                   | .759                                   |

**S2-TableS2d: Cronbach Alphas for Reward Construct**

| <b>Reliability Statistics</b> |            |  |  |  |
|-------------------------------|------------|--|--|--|
| Cronbachs<br>Alpha            | N of Items |  |  |  |
| .805                          | 8          |  |  |  |

  

| <b>Item-Total-Statistics</b>                                                                                  |                               |                                      |                                        |                                        |
|---------------------------------------------------------------------------------------------------------------|-------------------------------|--------------------------------------|----------------------------------------|----------------------------------------|
| ERI F1+F2+F4 Items<br>(Reward)                                                                                | Scale Mean if<br>Item Deleted | Scale<br>Variance if<br>Item Deleted | Corrected<br>Item-Total<br>Correlation | Cronbach's<br>Alpha if Item<br>Deleted |
| I receive the respect I<br>deserve from my<br>supervisor or a<br>respective relevant<br>person                | 21.90                         | 37.123                               | .451                                   | .793                                   |
| My job promotion<br>prospects are good                                                                        | 22.96                         | 35.394                               | .564                                   | .777                                   |
| I have experienced or I<br>expect to experience an<br>undesirable change in<br>my work situation              | 22.39                         | 36.035                               | .431                                   | .797                                   |
| My job security is poor                                                                                       | 22.31                         | 34.700                               | .413                                   | .805                                   |
| Considering all my<br>efforts and<br>achievements, I receive<br>the respect and prestige<br>I deserve at work | 22.33                         | 35.336                               | .627                                   | .770                                   |

|                                                                                      |       |        |      |      |
|--------------------------------------------------------------------------------------|-------|--------|------|------|
| Considering all my efforts and achievements, my job promotion prospects are adequate | 22.76 | 33.467 | .685 | .759 |
| Considering all my efforts and achievements, my salary is adequate                   | 22.53 | 34.976 | .520 | .783 |
| My salary is fair compared to others who have similar work tasks                     | 22.43 | 35.253 | .520 | .783 |

**S2-TableS3: Results of the comparative factor analyses (CFAs) for all independent variables**

| <b>Independent Variable</b>                        | <b>Comparative Fit Index (CFI)</b> | <b>Tucker-Lewis Index (TLI)</b> | <b>Root Mean Square Error of Approximation (RMSEA)</b> | <b>Difference to model without accounting for covariances between indicators</b> |
|----------------------------------------------------|------------------------------------|---------------------------------|--------------------------------------------------------|----------------------------------------------------------------------------------|
| Publication Pressure (PPQ)                         | 0.958                              | 0.939                           | 0.063 90%CI(.057, .069).                               | $\chi^2(5) = 374.19$ ; $p < .001$                                                |
| Effort Reward Imbalance (ERI)                      | 0.967                              | 0.953                           | 0.044 90%CI(.039, .048)                                | $\chi^2(18) = 475.02$ ; $p < .001$                                               |
| Organisational Justice: Resource Allocation        | 0.977                              | 0.970                           | 0.055 90%CI(.050, .059)                                | $\chi^2(8) = 3655.6$ ; $p < .001$                                                |
| Organisational Justice: Peer Review                | 0.969                              | 0.960                           | 0.064 90%CI(.060, .069)                                | $\chi^2(5) = 1708.7$ ; $p < .001$                                                |
| Organisational Justice: Grant Application          | 0.979                              | 0.971                           | 0.055 90%CI(.049, .061)                                | $\chi^2(10) = 1220.6$ ; $p < .001$                                               |
| Organisational Justice: Telescope Time Application | 0.963                              | 0.952                           | 0.068 90%CI(0.062, 0.074)                              | $\chi^2(7) = 982.7$ ; $p < .001$                                                 |
